# Supplementary material
Source: publisher site journal article supplement (https://www.dovepress.com/article/supplementary_file/576568/576568_Supplementary%20%25286%2529.docx)
Supplement: Supplementary file 1 [file 576568_Supplementary%20%25286%2529.docx]

**Figure legends**

**Supplementary Table 1** **Genetic instrument selection for immunophenotypes in the GWAS meta-analysis dataset.** List of all 731 immunophenotypes and the corresponding SNP instruments used in the GWAS meta-analysis–based MR analyses. For each immune trait, the table summarizes the number of SNPs selected under the clumping and significance thresholds (*P*<5×10⁻⁶, r²<0.001, 1,000-kb window) and the associated F-statistics, ensuring adequate instrument strength.

**Supplementary Table 2** **Genetic instrument selection for immunophenotypes in the FinnGen outcome dataset.** List of immunophenotypes and SNP instruments used when PCOS outcome data were taken from FinnGen. For each immune trait, the table summarizes the number of SNPs carried forward from the GWAS meta-analysis instrument set after harmonization with FinnGen and the corresponding F-statistics.

**Supplementary file 1** **Funnel plots for MR analyses of immune traits and PCOS in the GWAS meta-analysis dataset.** Funnel plots are shown for immune traits that reached nominal significance (inverse-variance–weighted *P*<0.05) in the discovery GWAS meta-analysis. SNP-specific MR estimates (log odds ratio [OR] for PCOS per allele) are plotted against their standard errors for the IVW and MR-Egger estimators, allowing visual assessment of symmetry and potential directional pleiotropy.

**Supplementary file 2** **Leave-one-out sensitivity analyses for MR analyses of immune traits and PCOS in the GWAS meta-analysis dataset.** For each immune trait plotted in Supplementary file 1, leave-one-out plots show the IVW causal estimate recalculated after sequential exclusion of each SNP instrument, assessing whether the overall MR estimate is driven or biased by any single variant.

**Supplementary file 3** **Funnel plots for MR analyses of immune traits and PCOS in the FinnGen outcome dataset.** Funnel plots are shown for immune traits that reached nominal significance (IVW *P*<0.05) in the FinnGen replication analysis. SNP-specific MR estimates (log OR for PCOS per allele) are plotted against their standard errors for the IVW and MR-Egger estimators to evaluate funnel symmetry and potential directional pleiotropy.

**Supplementary file 4** **Leave-one-out sensitivity analyses for MR analyses of immune traits and PCOS in the FinnGen outcome dataset.** For each immune trait plotted in Supplementary file 3, leave-one-out analyses show the IVW causal estimate recalculated after sequential removal of individual SNP instruments, evaluating the robustness of the FinnGen replication estimates to single-variant influence.

**Supplementary figure 1** **Single-sample pathway activity scores for inflammatory Hallmark gene sets in PCOS and control whole blood.** Boxplots display rank-based singscore activities for selected MSigDB Hallmark pathways (IL-6/JAK/STAT3 signaling, TNF-α/NF-κB signaling, Inflammatory Response, and interferon-α/γ [IFN-α/γ] responses) in PCOS (n=4) and control (n=4) samples from GSE54248. Higher scores reflect higher inferred pathway activity. Group differences were evaluated using Wilcoxon rank-sum tests, and effect sizes were summarized as Cohen’s d (see main text for detailed statistics).

**Supplementary Table 1** **Genetic instrument selection for immunophenotypes in the GWAS meta-analysis dataset.** List of all 731 immunophenotypes and the corresponding SNP instruments used in the GWAS meta-analysis–based MR analyses. For each immune trait, the table summarizes the number of SNPs selected under the clumping and significance thresholds (*P*<5×10⁻⁶, r²<0.001, 1,000-kb window) and the associated F-statistics, ensuring adequate instrument strength.

**Supplementary Table 2** **Genetic instrument selection for immunophenotypes in the FinnGen outcome dataset.** List of immunophenotypes and SNP instruments used when PCOS outcome data were taken from FinnGen. For each immune trait, the table summarizes the number of SNPs carried forward from the GWAS meta-analysis instrument set after harmonization with FinnGen and the corresponding F-statistics.

**Supplementary file 1** **Funnel plots for MR analyses of immune traits and PCOS in the GWAS meta-analysis dataset.** Funnel plots are shown for immune traits that reached nominal significance (inverse-variance–weighted *P*<0.05) in the discovery GWAS meta-analysis. SNP-specific MR estimates (log odds ratio [OR] for PCOS per allele) are plotted against their standard errors for the IVW and MR-Egger estimators, allowing visual assessment of symmetry and potential directional pleiotropy.

**Supplementary file 2** **Leave-one-out sensitivity analyses for MR analyses of immune traits and PCOS in the GWAS meta-analysis dataset.** For each immune trait plotted in Supplementary file 1, leave-one-out plots show the IVW causal estimate recalculated after sequential exclusion of each SNP instrument, assessing whether the overall MR estimate is driven or biased by any single variant.


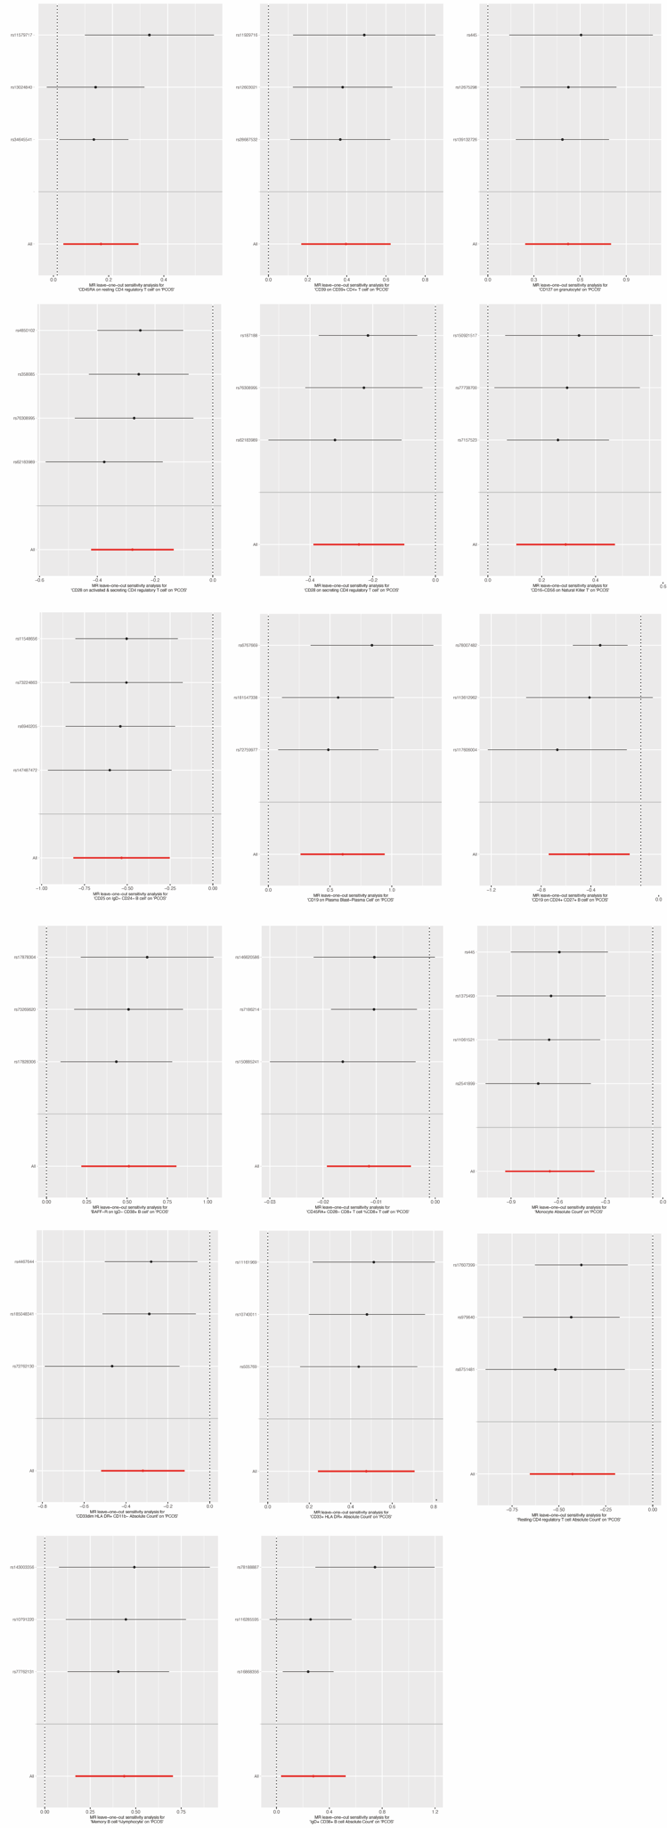


**Supplementary file 3** **Funnel plots for MR analyses of immune traits and PCOS in the FinnGen outcome dataset.** Funnel plots are shown for immune traits that reached nominal significance (IVW *P*<0.05) in the FinnGen replication analysis. SNP-specific MR estimates (log OR for PCOS per allele) are plotted against their standard errors for the IVW and MR-Egger estimators to evaluate funnel symmetry and potential directional pleiotropy.

**
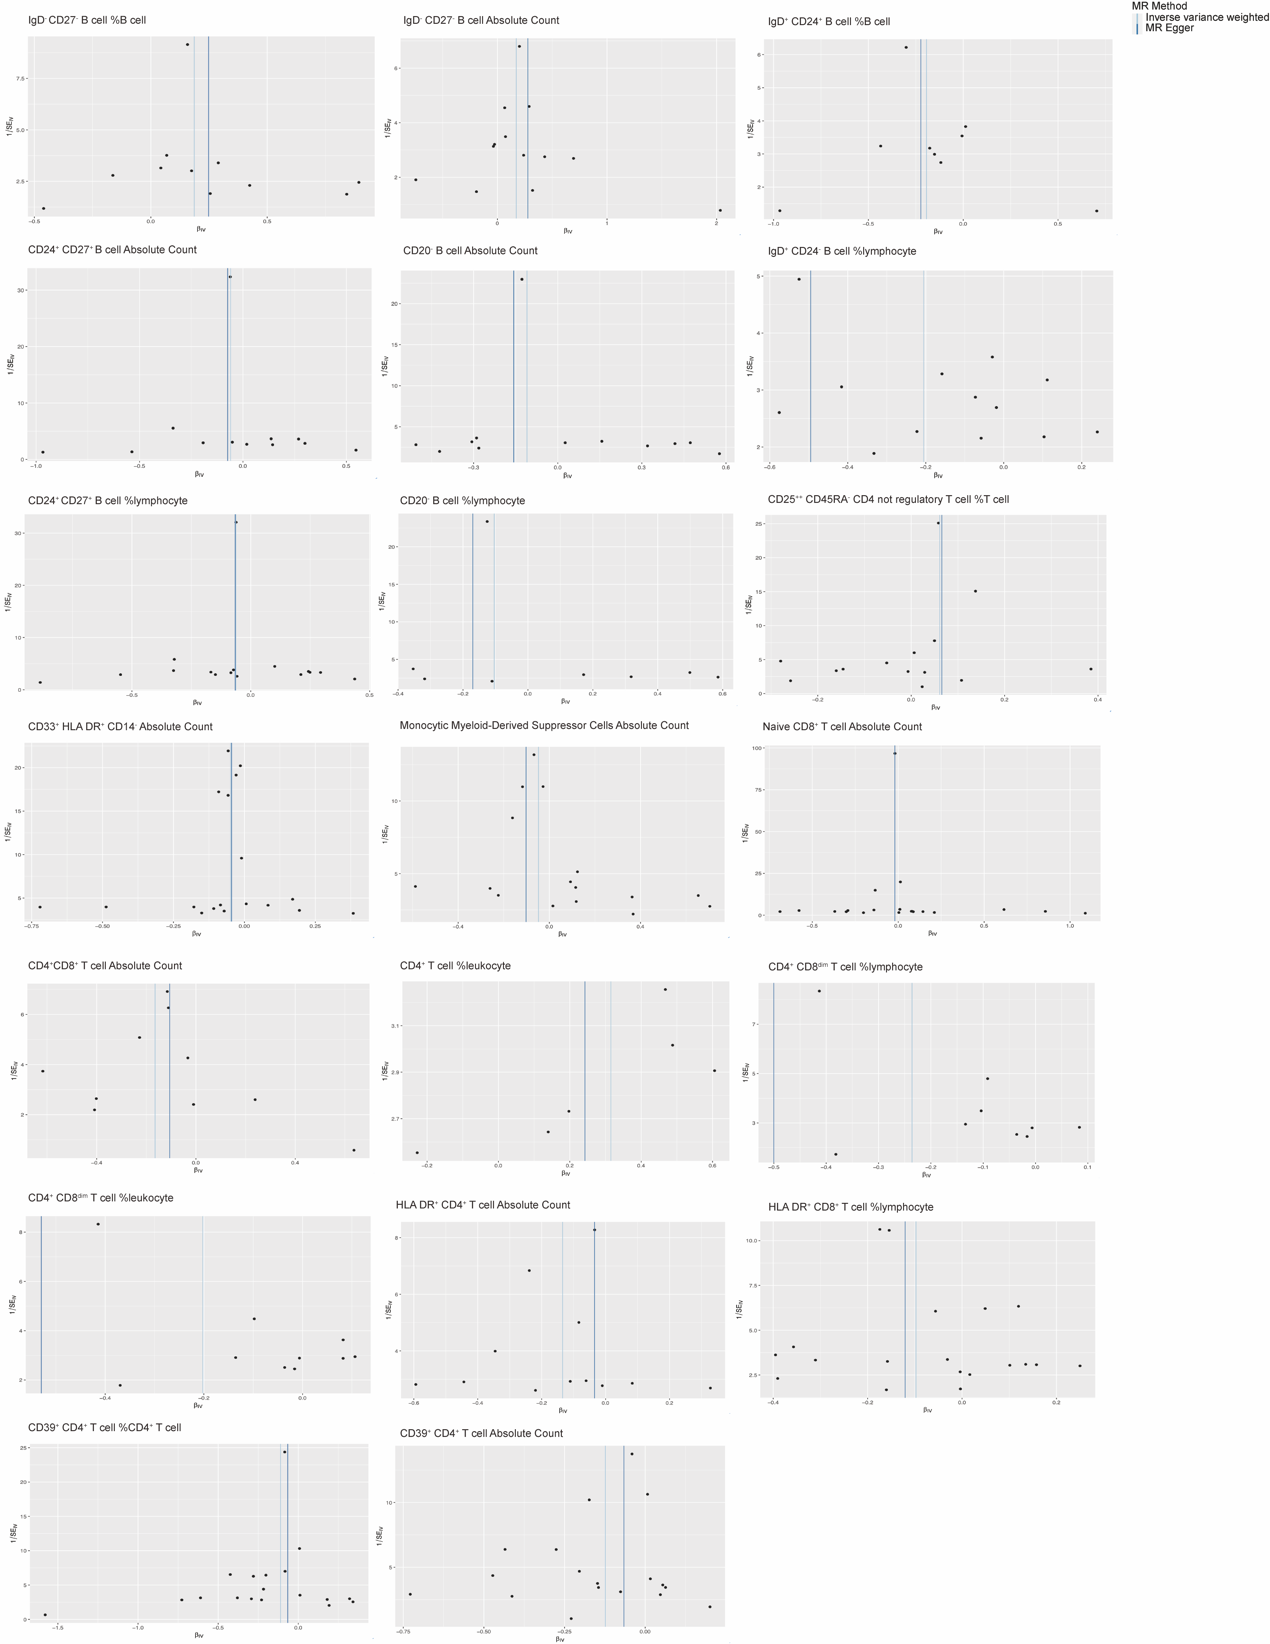
**

**Supplementary file 4** **Leave-one-out sensitivity analyses for MR analyses of immune traits and PCOS in the FinnGen outcome dataset.** For each immune trait plotted in Supplementary file 3, leave-one-out analyses show the IVW causal estimate recalculated after sequential removal of individual SNP instruments, evaluating the robustness of the FinnGen replication estimates to single-variant influence.
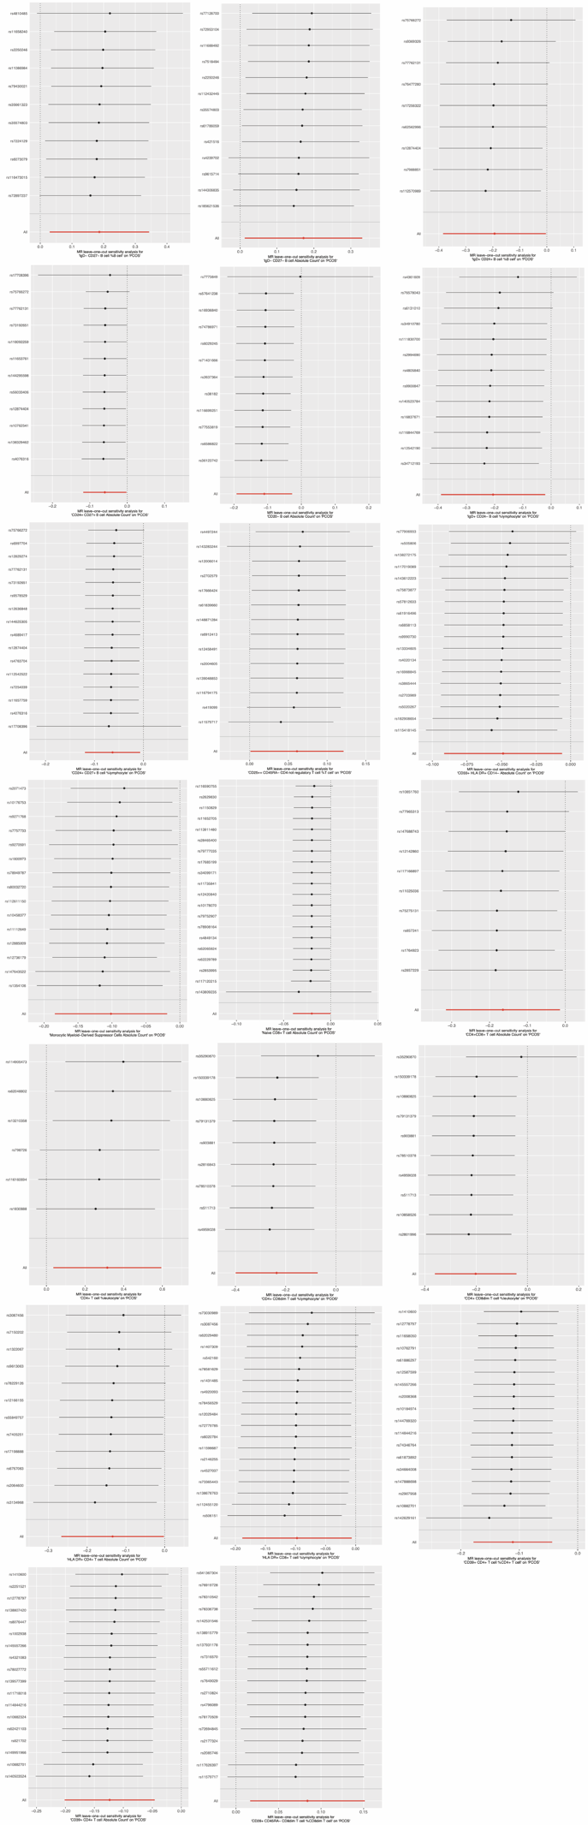


**
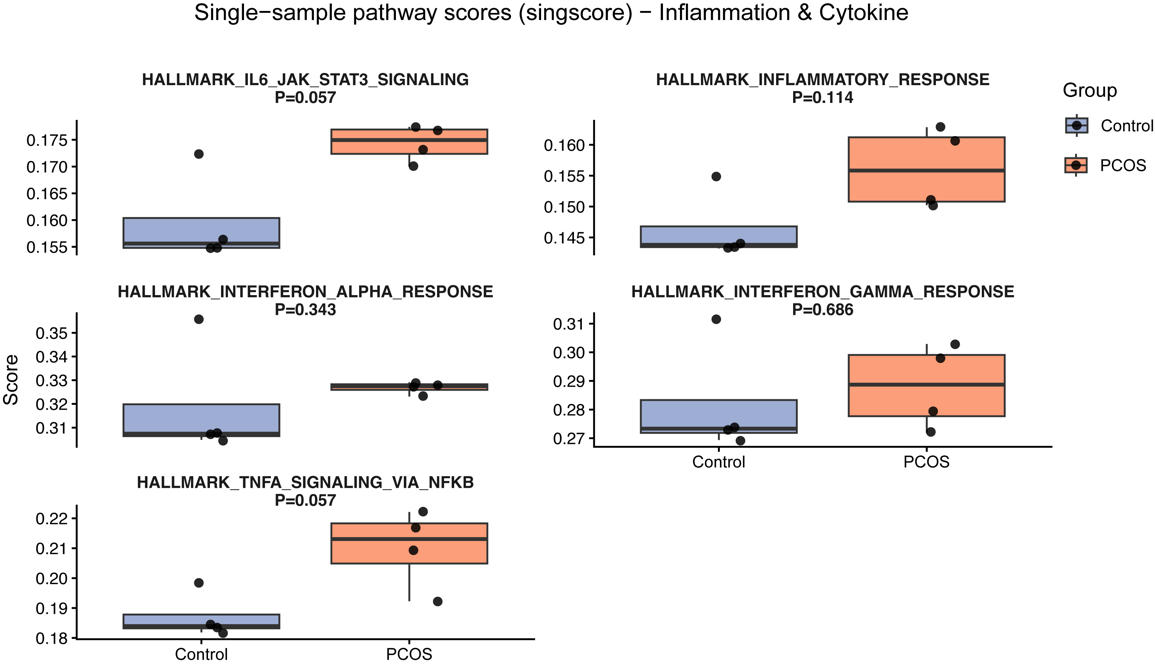
**

**Supplementary figure 1** **Single-sample pathway activity scores for inflammatory Hallmark gene sets in PCOS and control whole blood.** Boxplots display rank-based singscore activities for selected MSigDB Hallmark pathways (IL-6/JAK/STAT3 signaling, TNF-α/NF-κB signaling, Inflammatory Response, and interferon-α/γ [IFN-α/γ] responses) in PCOS (n=4) and control (n=4) samples from GSE54248. Higher scores reflect higher inferred pathway activity. Group differences were evaluated using Wilcoxon rank-sum tests, and effect sizes were summarized as Cohen’s d (see main text for detailed statistics).
